# Supplementary material
Source: PubMed Central journal article supplement (PMC6197058)
Supplement: NIHMS1506283-supplement-1.pdf [file NIHMS1506283-supplement-1.pdf]

# Figure S1

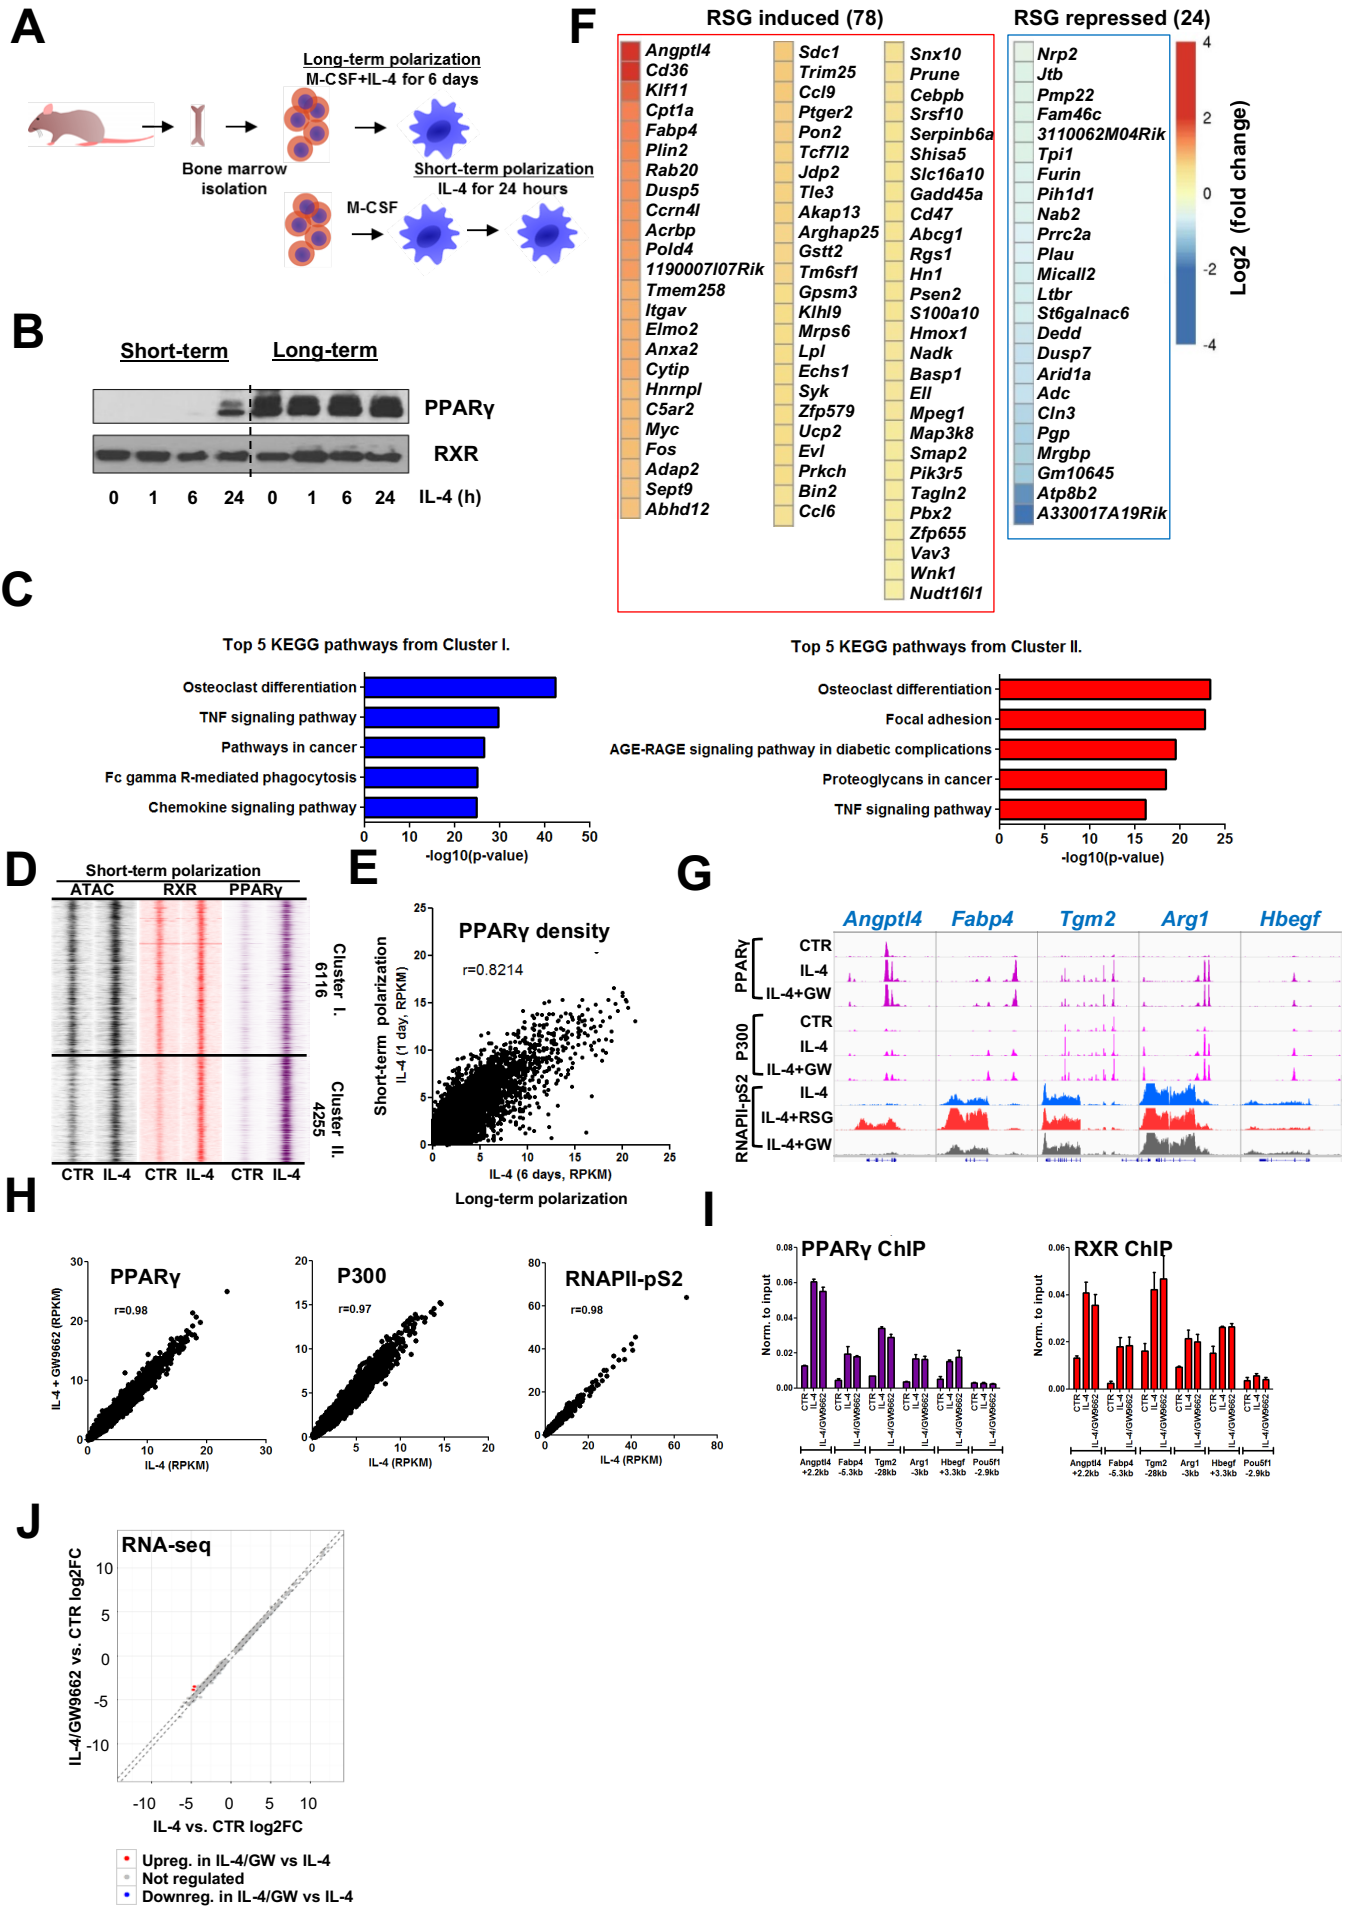

**Figure S1 (Related to Figure 1). Characterization of the PPAR $\gamma$ :RXR heterodimer cistrome in alternatively polarized macrophages.**

**A;** Scheme of macrophage polarization systems used in the study. Bone marrow-derived cells were either differentiated in the presence of M-CSF or M-CSF+IL-4 (5ng/ul) for 6 days. Short-term polarization was performed on M-CSF differentiated cells for 24 hours. **B;** Western blot analyses of total protein from the two polarization models. Polarization of M-CSF-differentiated cells were performed in the presence of IL-4 (20ng/ul) and samples were collected at the indicated time points. Long-term polarization was performed as described above. On the 6<sup>th</sup> day of differentiation cells were exposed to IL-4 (20ng/ul) and samples were collected at the indicated time points. **C;** KEGG pathway analysis of the genes annotated to the PPAR $\gamma$ :RXR heterodimer-bound genomic regions from Cluster I. and II. Top five functional terms are shown. The closest genes that were located +/- 100kb from the heterodimer-bound loci were annotated yielding 1578 genes for Cluster I. and 1119 genes for Cluster II., respectively. **D;** Read distribution plot of ATAC-seq, PPAR $\gamma$  and RXR ChIP-seq in non-polarized (CTR) and IL-4 polarized (IL-4, 24h – short-term polarization) macrophages in a 1.5 kb window around the summit of the RXR peaks determined from the long-term polarization system shown in Fig. 1A. Cluster I. represents constitutive RXR-bound genomic regions, while cluster II. shows *de novo* PPAR $\gamma$ :RXR sites. **D;** Correlation plot of the PPAR $\gamma$  cistromes obtained from the two polarization settings. RPKM (Reads Per Kilobase per Million reads) values are presented. Pearson correlation coefficient is indicated. **E;** Heat maps depicting RSG-induced and repressed genes, regulated in the two replicates and showing at least 1.3 fold difference. Fold changes are relative to IL-4+vehicle-treated cells. **F;** Genome browser view of PPAR $\gamma$ , P300 and RNAPII-S2 enrichments in the presence of the indicated compounds (RSG-rosiglitazone, PPAR $\gamma$  agonist; GW-GW9662, PPAR $\gamma$  antagonist). **G;** Correlation plot of PPAR $\gamma$ , P300 and RNAPII-S2 RPKM (Reads Per Kilobase per Million reads) values from IL-4 and IL-4+GW9662-treated macrophages. Pearson correlation coefficient is indicated. **H;** ChIP-qPCR measurements for PPAR $\gamma$  and RXR in the presence of IL-4 and IL-4+GW9662 on the indicated enhancers. *Pou5f1* -2.9kb region was used as a negative control. Each bar represents mean +/- SD of duplicate determinations. **I;** Scatter plot depicting IL-4-regulated genes (based on CPM-Counts Per Million values) in the presence of GW9662. Genes not regulated by GW9662 are depicted in grey. Changes were considered significant using edgeR GLM (General Linear Model,  $p < 0.05$ ) and 1.3-fold change using two replicates for each conditions.

**Figure S2**

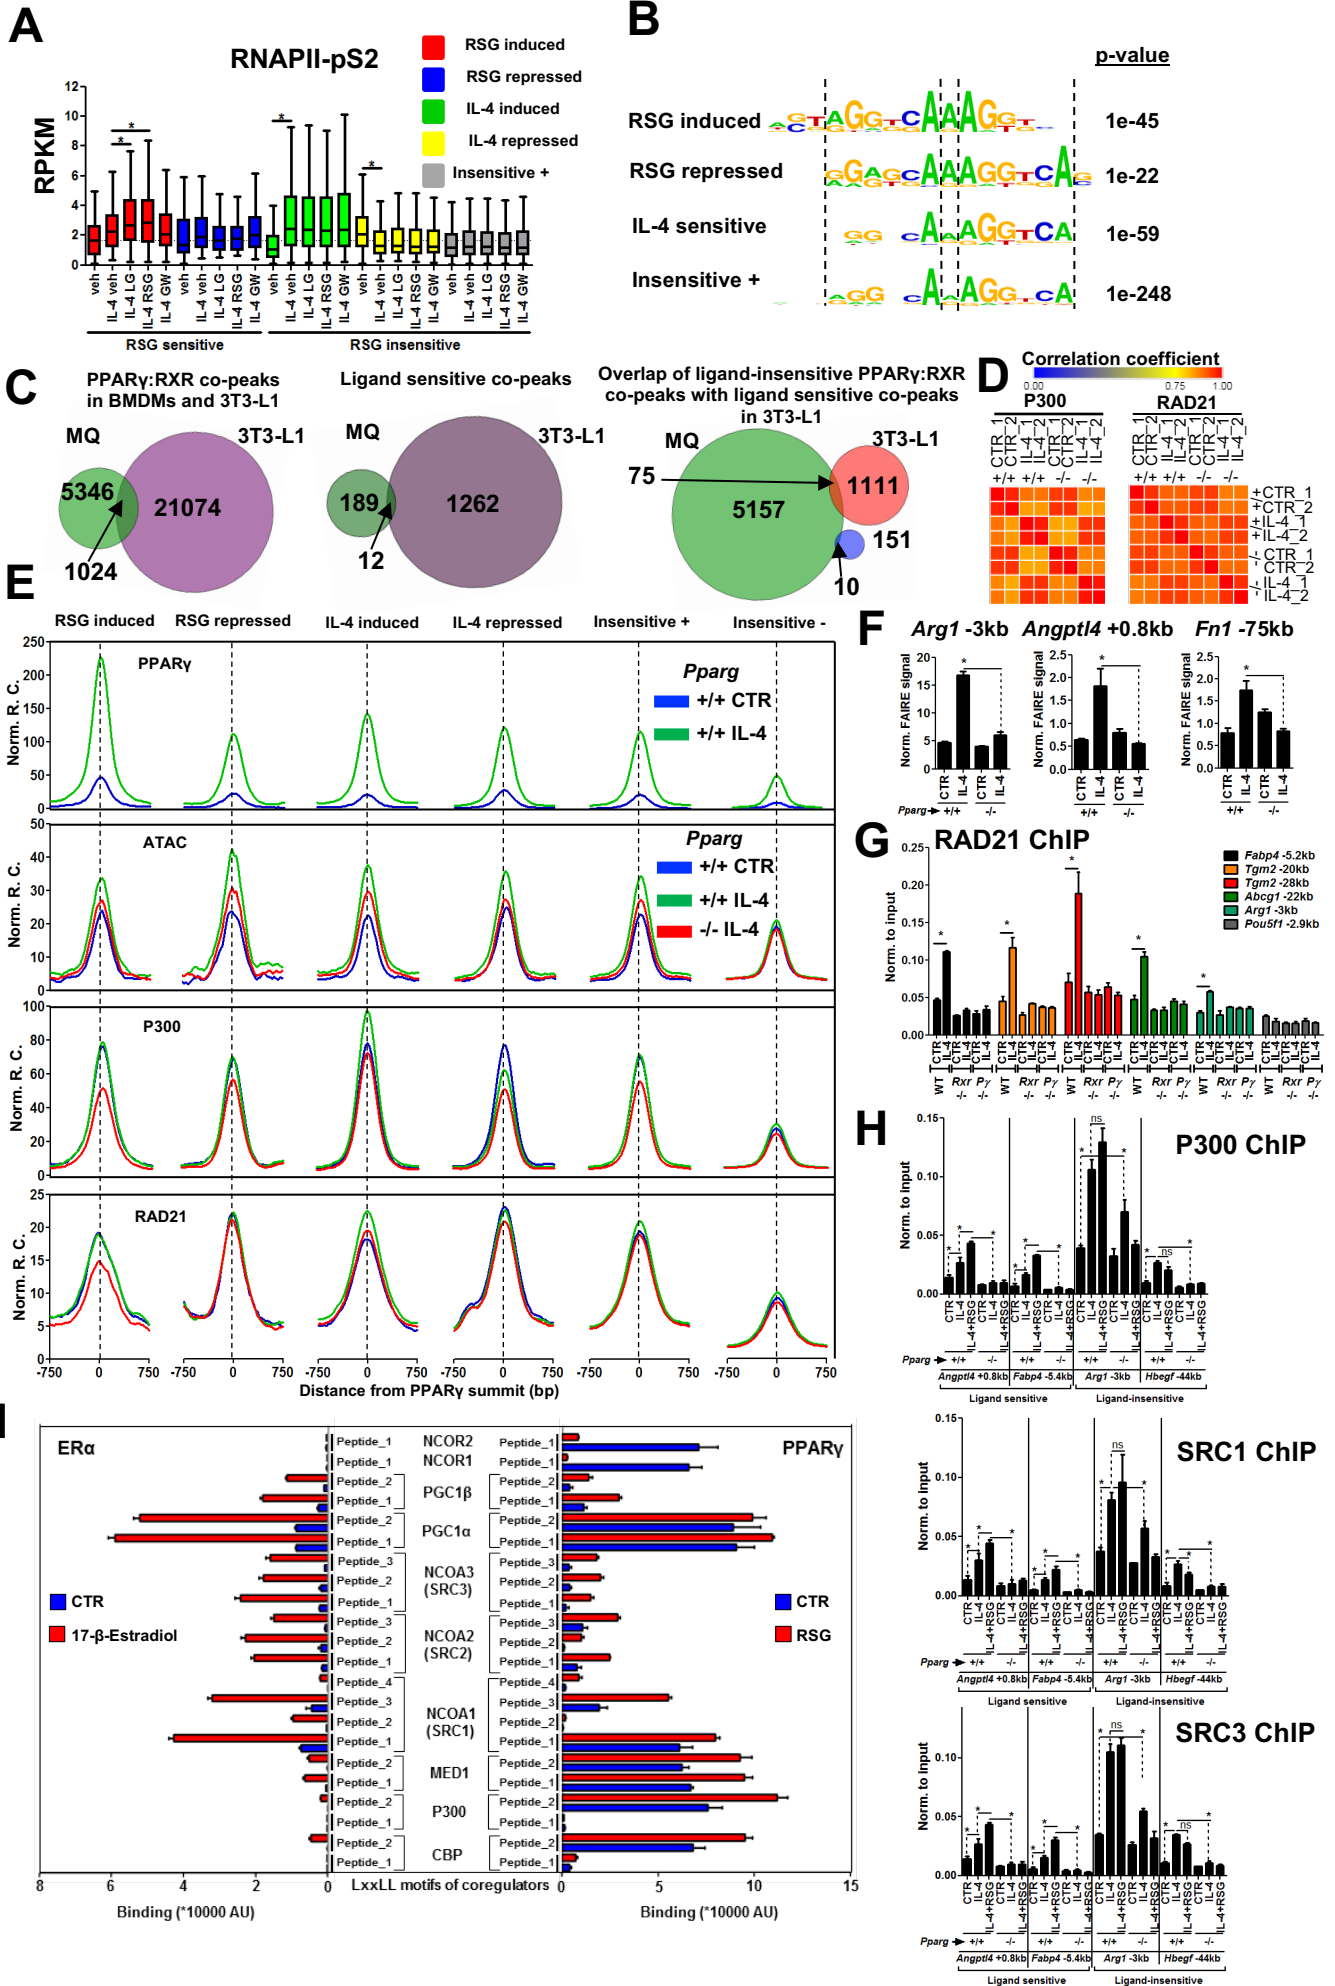

**Figure S2 (Related to Figure 2). Characterization of the ligand-sensitive, -insensitive PPAR $\gamma$  cistrome in alternatively activated macrophages.**

**A;** Box plot depicting RNAPII-pS2 enrichments (RPKM) in the presence of the indicated compounds (LG-LG268, RXR agonist; RSG, PPAR $\gamma$  agonist; GW-GW9662, PPAR $\gamma$  antagonist) determined by ChIP-seq on PPAR $\gamma$ :RXR-bound loci. “veh” stands for solvent control. Changes were considered significant at  $p < 0.05$  using two tailed paired t test using two replicates for each conditions. **B;** *De novo* motif enrichments for DR1 at the indicated enhancer groups. **C;** Venn diagram representation of the overlapping PPAR $\gamma$ :RXR-bound genomic regions between macrophages and 3T3-L1 adipocytes under the indicated analytical circumstances. **D;** Heat map representation of the Pearson correlation coefficients between the replicates of the P300 and RAD21 ChIP-seq experiments. **E;** Histograms depicting read enrichments for ATAC-seq, PPAR $\gamma$ , P300 and RAD21 ChIP-seq around RXR summits on the different enhancer categories from wild-type  $+/+$  and *Pparg*  $-/-$  cells. One representative example of the two replicates is shown. **F;** FAIRE-qPCR analysis of chromatin accessibility on the indicated loci in wild-type  $+/+$  and *Pparg*  $-/-$  macrophages in the presence or absence of IL-4. Mean  $\pm$  SD of duplicate determinations are shown and changes were considered significant using two tailed, unpaired t test at  $p < 0.05$ . **G;** ChIP-qPCR measurements for RAD21 in the presence of IL-4 in *Pparg*  $-/-$  (*P $\gamma$*   $-/-$ ) and *Rxra/b*  $-/-$  (*Rxr*  $-/-$ ) macrophages on the indicated enhancers. *Pou5f1* -2.9kb region was used as a negative control. **H;** ChIP-qPCR analysis for P300, SRC1 and SRC2 in wild-type  $+/+$  and *Pparg*  $-/-$  macrophages in the absence (CTR) and presence of IL-4 or IL-4+RSG on the indicated gene loci. ChIP-qPCR on panel G and H represents mean  $\pm$  SD of at least two replicates for all the qPCR-based measurements, and changes were considered significant at  $p < 0.05$  using two tailed unpaired t test. **I;** Bar graph representation of MARCoNI assay results for the indicated coregulator peptides in the presence of apo- (unliganded) and holo-PPAR $\gamma$  and ER $\alpha$  receptor ligand binding domains. Mean  $\pm$  SEM of four replicate measurements are shown.

**Figure S3**

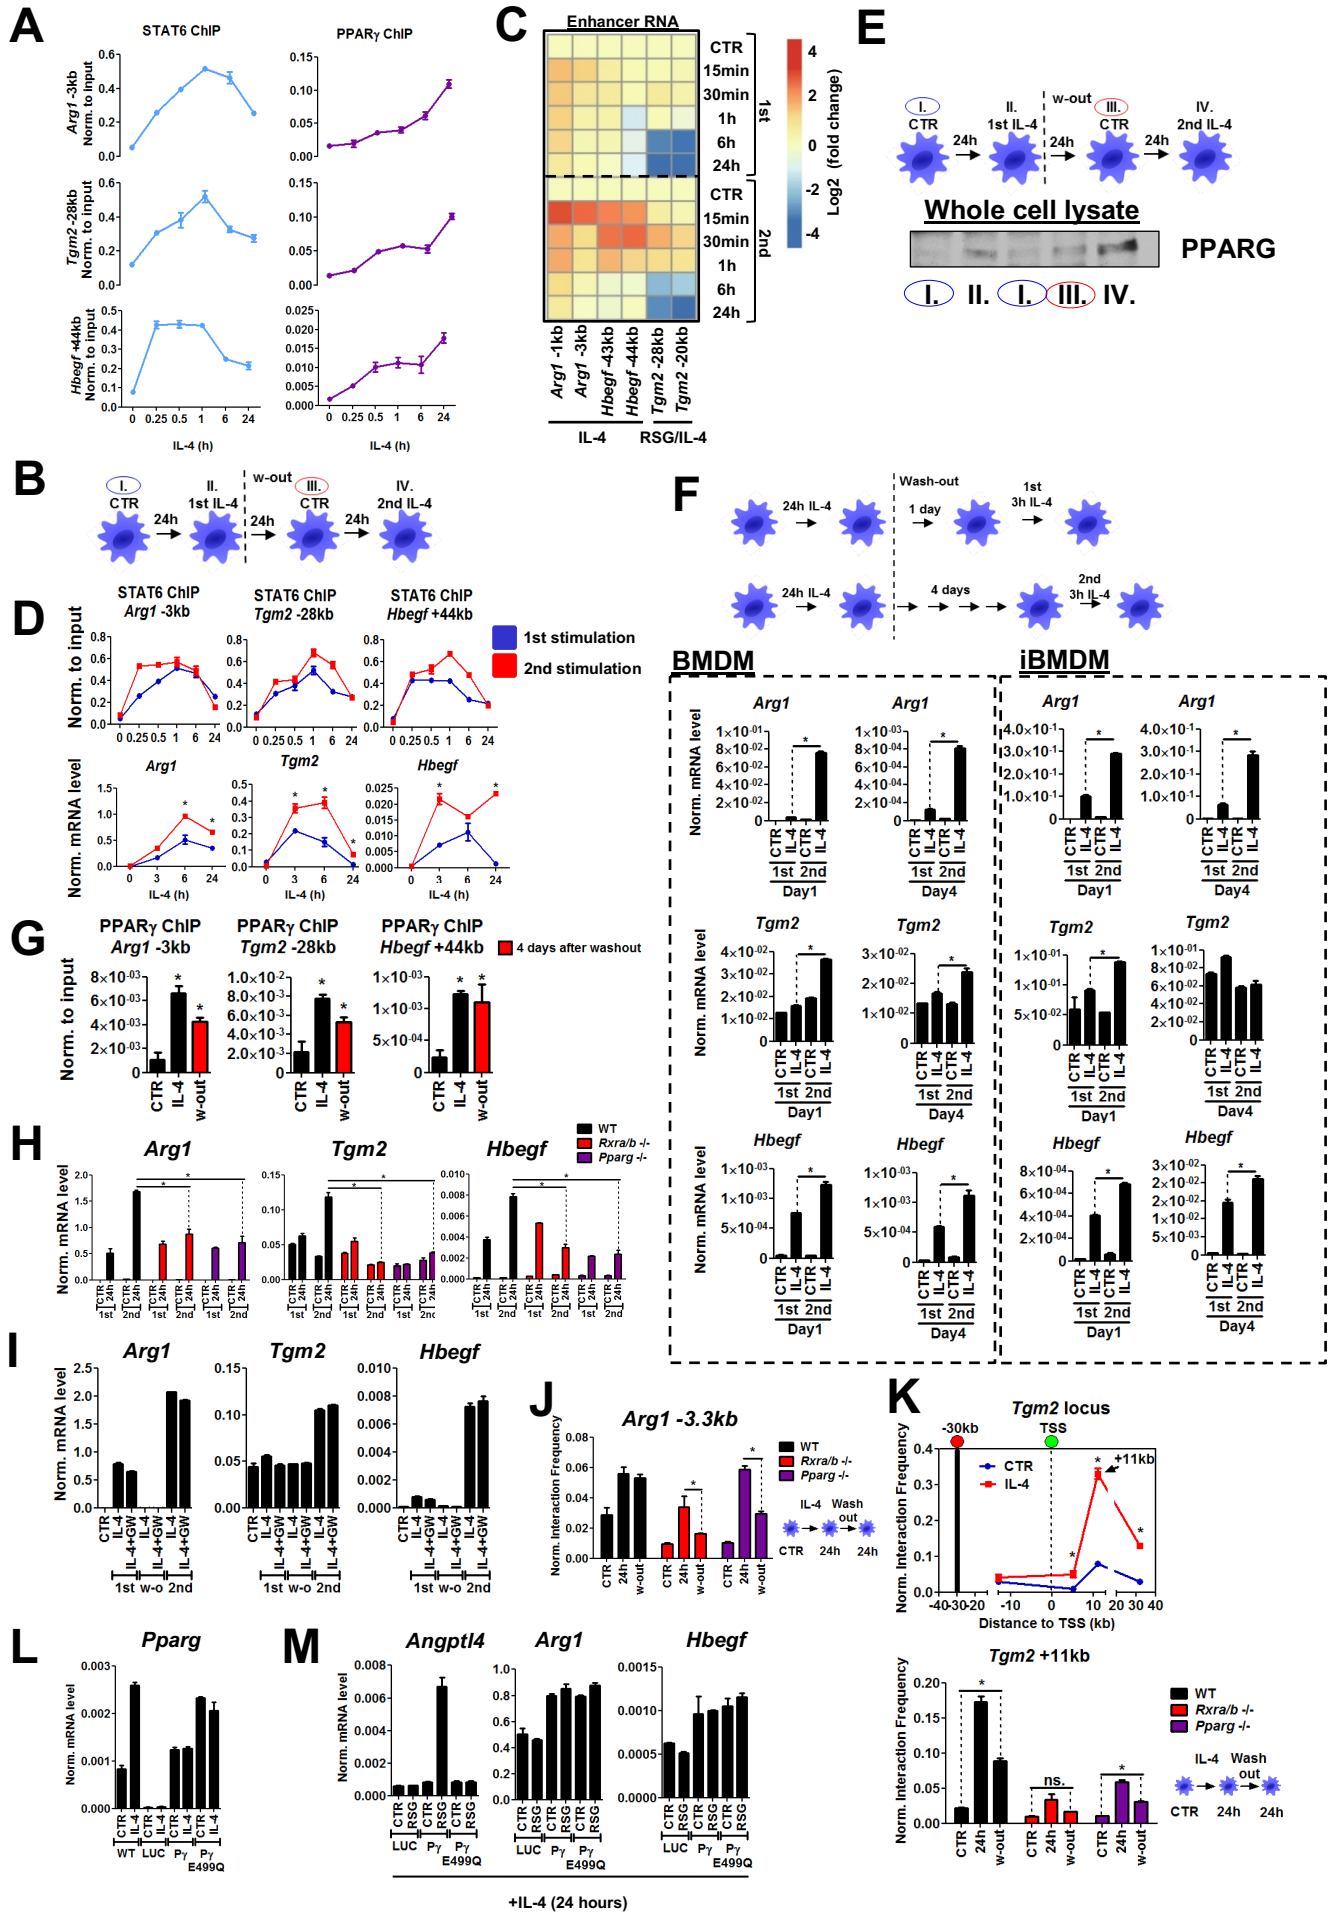

**Figure S3 (Related to Figure 3). Transcriptional memory to IL-4 is predominant and it requires PPAR $\gamma$  on a select set of genes.**

**A;** ChIP-qPCR measurements carried out for STAT6 and PPAR $\gamma$  on the indicated IL-4 time course in wild type macrophages. Each data point represent mean +/- SD of duplicate determinations. **B;** Experimental setup to study transcriptional memory in macrophages. Cells were stimulated with IL-4 for 24 hours (24h, IL. 1<sup>st</sup> IL-4) or left untreated (I. CTR). After stimulation, IL-4 containing media is removed followed by extensive washing steps (w-out) and 24 hours of incubation and collected (III. CTR) or the 2<sup>nd</sup> stimulation was performed (IV. 2<sup>nd</sup> IL-4). **C;** Heat map representation of enhancer RNA measurements by qPCR on the indicated loci. First (1st) and second (2nd) IL-4 stimulation was performed for the indicated period of time in the same experimental system as described for panel B. Heat map represents log<sub>2</sub> fold change from three independent measurements. Enhancers sensitive to IL-4 only or IL-4 and RSG are marked at the bottom. **D;** STAT6 ChIP-qPCR and gene expression (mRNA) measurements performed on the presented genes and gene loci in the presence of IL-4 for the indicated period of time. 2<sup>nd</sup> stimulation was performed after 24 hours of IL-4 pre-treatment followed by wash out, resting (24 hours) and restimulation for the indicated periods of time. Mean +/- SD of duplicate (ChIP) and triplicate (mRNA) measurements are shown and significant changes were determined at  $p < 0.05$  using two tailed unpaired t test. **E;** Western blot from IL-4 stimulated macrophages according to the experimental setup presented on panel B, for PPAR $\gamma$ . Blue (basal without IL-4 stimulation) and red circles (after first IL-4 stimulation and wash-out) show the two control states. **F;** Experimental setup used to study transcriptional memory after 4 days of IL-4 exposure in macrophages. Cells were stimulated with IL-4 for 24 hours (24h, 1st IL-4) or left untreated (CTR, 1st). After stimulation, IL-4 containing media were removed followed by extensive washing steps (wash-out). Cells were further incubated for 24 hours (1 day) or for 4 days in fresh media and collected (2nd CTR) or second stimulation was performed with IL-4 (2nd IL-4) (top). Gene expression measurements (mRNA) of the indicated genes was performed in primary macrophages bone marrow-derived macrophages (BMDM) and in immortalized BMDMs (iBMDM) using the setup presented above (bottom). Mean +/- SD of triplicate determinations are shown and considered significant at  $p < 0.05$  using two tailed unpaired t test. **G;** ChIP-qPCR measurements for PPAR $\gamma$  on the indicated enhancers after the first stimulation and 4 days after wash-out (red). Two tailed, unpaired t tests were performed and significant differences are indicated at  $p < 0.05$  ( $n=2$ ). **H;** Gene expression (mRNA) analysis of *Arg1*, *Tgm2* and *Hbegf* upon first (1st) and second (2nd) IL-4 exposure from wild type (WT), *Pparg* and *Rxra/b*  $-/-$  cells. Each data point represents mean +/- SD of triplicate determinations and changes were considered significant at  $p < 0.05$  using two tailed unpaired t test. **I,** Gene expression analysis (mRNA) of *Arg1*, *Tgm2* and *Hbegf* upon first (1st) IL-4 exposure, after wash-out (w-o) and after second (2nd) IL-4 stimulation in the presence or absence of the PPAR $\gamma$  antagonist GW9662 (GW). Mean +/- SD of triplicate measurements are presented. **J,** 3C-qPCR carried out at the *Arg1* locus in *Rxra/b*  $-/-$  and *Pparg*  $-/-$  macrophages and interaction frequency is presented at the focal point of the interaction (+11kb). Experimental scheme is also shown. Each data point represents mean +/- SD of duplicate determinations. Differences were considered significant at  $p < 0.05$  using two tailed unpaired t test. **K;** 3C-qPCR performed on the *Tgm2* locus. Each data point represents mean +/- SD of duplicate determinations. Differences were considered significant at  $p < 0.05$  using two tailed unpaired t test. **L;** Gene expression (mRNA) measurements of *Pparg* in wild type (WT) and *Pparg*  $-/-$  macrophages expressing luciferase, wild type PPAR $\gamma$  (P $\gamma$ ) and transactivation function mutant PPAR $\gamma$  (P $\gamma$  E499Q). Mean +/- SD of triplicate determinations are shown. **M;** Gene expression (mRNA) measurements of the indicated genes from the same model as on panel L. Cells were either treated with RSG or left untreated (CTR) to test ligand inducible gene transcription. Mean +/- SD of triplicate measurements are shown.

**Figure S4**

**A**

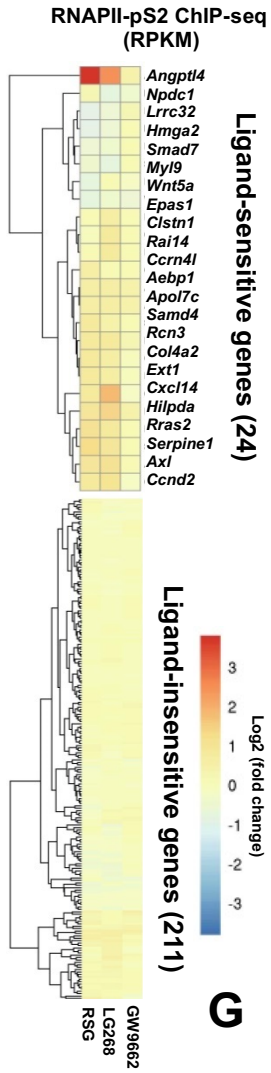

**B**

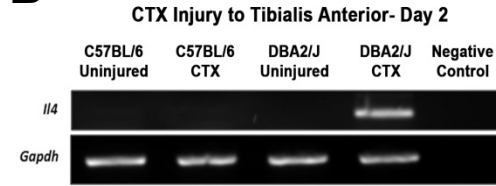

**C**

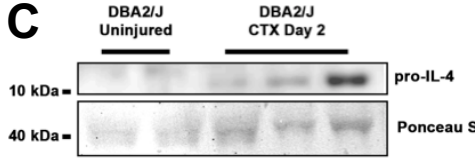

**D**

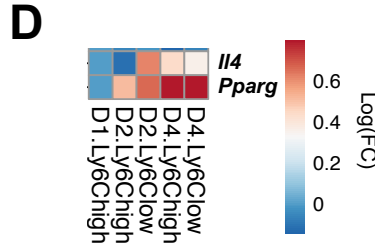

**E**

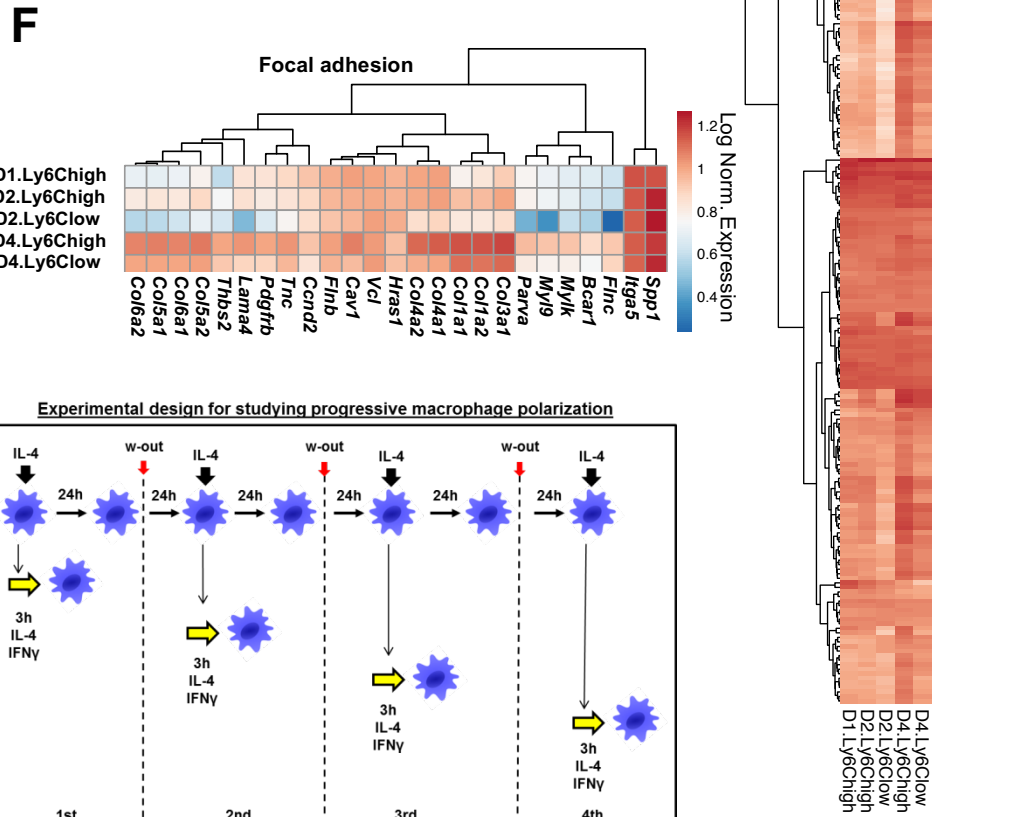

**F**

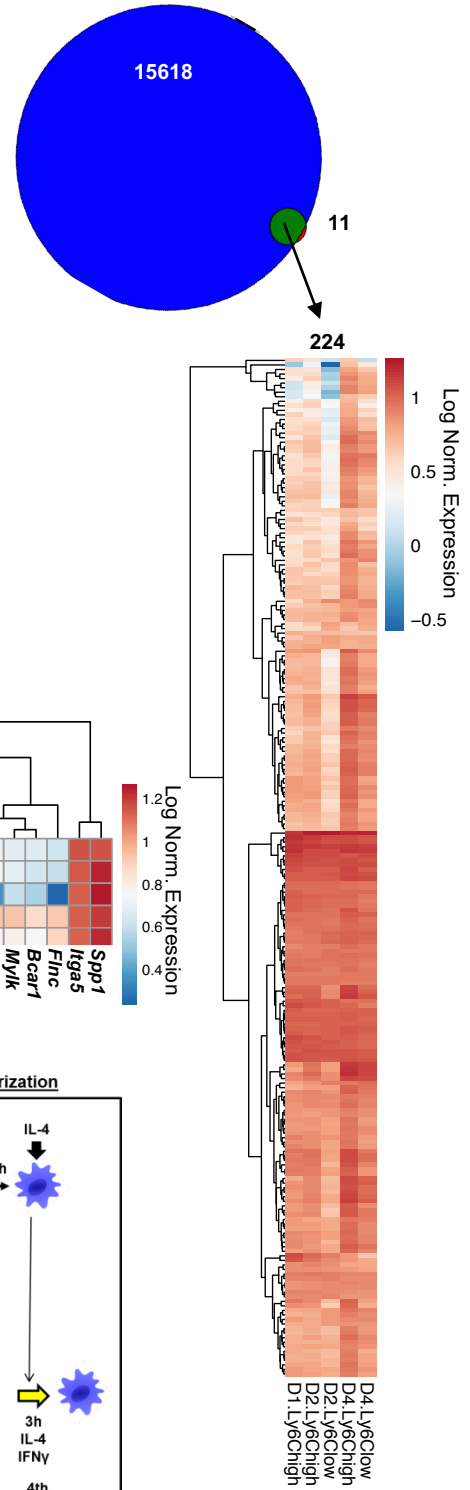

**H**

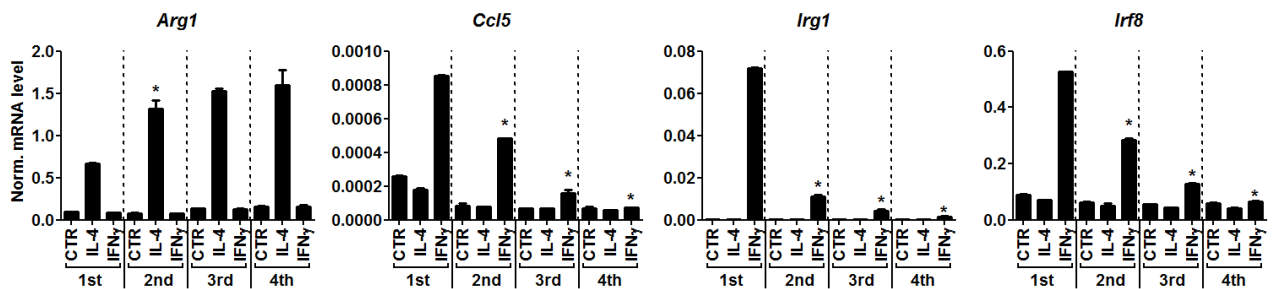

**Figure S4 (Related to Figure 4). Newly infiltrating macrophages possess and progressively induce the gene signature of IL-4/PPAR $\gamma$ -dependent transcription memory during muscle regeneration.**

**A;** Heat map depicting the RPKM values of RNAPII-S2 CHIP-seq results in the presence of the solvent control (CTR), RXR agonist (LG268), PPAR $\gamma$  agonist (RSG) and PPAR $\gamma$  antagonist (GW9662) on the gene set exhibiting PPAR $\gamma$ -mediated transcriptional memory. DiffBind analysis was performed to identify significantly ( $p < 0.05$ ) changing RNAPII-pS2 enrichments on the gene bodies. Genes significantly changing and exhibiting at least 1.5 fold difference compared to solvent control are considered ligand sensitive using two replicates. **B;** PCR analysis of the expression of *Ii4* and *Gapdh* in DBA2J uninjured and cardiotoxin (CTX) injured whole muscle lysates. **C;** Western blot for pro-IL-4 in DBA2J uninjured and CTX injured whole muscle lysates. **D;** Heat map representation ( $\text{Log}_{10}(\text{Fold Change})$ ) of *Ii4* and *Pparg* expression during the time course of regeneration in DBA2J mice derived sorted macrophages following the injury. **E;** Venn diagram representation of the overlap between the gene signature of macrophages derived from the regenerating tissue of DBA2J mice and the gene set observed on Figure 4B. Heat map depicts the overlapping section containing 224 genes (values represented as  $\text{Log}_{10}(\text{normalized expression})$ ). **F;** Heat map representation ( $\text{Log}_{10}(\text{normalized expression})$ ) of the genes related to the focal adhesion functional category (as determined on Figure 4F) from the DBA2J muscle infiltrating macrophages (D, day). **G;** Experimental model used to study progressive macrophage polarization. **H;** Gene expression measurements at the mRNA level for *Arg1*, *Ccl5*, *Irg1* and *Irf8* after the indicated number of IL-4 stimulations (see experimental setup on panel G) followed by either IL-4 or IFN $\gamma$  exposure. Mean  $\pm$  SD of triplicate measurements are shown and differences were considered significant at  $p < 0.05$  using two tailed unpaired t test.



## **Supplemental table titles**

Table S1: MARCoNI data set of coregulator peptides. Related to Figure S2.

Table S2: Primers used in this study. Related to Figures 1, 2, 3, 4 and all the supplemental figures.

Table S3: QC of sequencing data. Related to Figures 1, 2, 3, 4 and all the supplemental figures.
